# Supplementary material
Source: Frontiers journal article supplement (https://www.frontiersin.org/articles/92333)
Supplement: Data_Sheet_2.DOCX [file Data_Sheet_2.DOCX]

Supplementary Table 2. T2 profile description.

|  |  |  |
| --- | --- | --- |
| **Horizon** | **depth (cm below surface)** | **Description** |
| O | 0-2 | Very dark grayish brown (10YR 3/2) sandy loam with moderate, fine, granular structure; many roots and partially-decomposed organic detritus; abrupt, smooth lower boundary |
| C | 2-8 | Brown (10YR 4/3) sandy loam with moderate, medium platy to massive structure; common fine to medium roots; interpreted as 2006-2007 flood deposit; abrupt, wavy lower boundary |
| AC | 8-15 | Very dark gray (10YR 3/1) gravelly sandy loam with massive structure; common to many fine roots; many gravels from recent historic remains; abrupt, smooth lower boundary |
| Ab | 15-19 | Very dark grayish brown (10YR 3/2) sandy loam with massive structure; common fine roots; upper portion of this horizon appears to have been altered by overlying anthropogenic gravel bed; clear, wavy lower boundary |
| ACb | 19-39 | Brown (10YR 4/3) sandy loam with massive structure; common fine roots; common fine charcoal fragments; grit-tempered prehistoric pottery fragment; gradual, smooth lower boundary |
| Ab2 | 39-49 | Dark grayish brown (10YR 4/2) sandy loam with massive structure; common, very fine, charcoal fragments; very few fine roots; common, medium, tubular burrows at base of horizon; clear, irregular lower boundary |
| BCb2 | 49-60 | Yellowish brown (10YR 5/4) loamy sand with massive structure; few distinct dark grayish brown (10YR 4/2) burrows; common light gray (10YR 7/2) irregular mottles; clear, smooth lower boundary |
| Bwb3 | 60-67 | Brown (7.5YR 4/3) sandy loam with massive structure; very few fine roots; few fine charcoal fragments; clear, wavy lower boundary |
| BCb3 | 67-73 | Yellowish brown (10YR 5/4) sandy loam with massive structure; very few fine roots; common light gray (10YR 7/2) irregular mottles; abrupt, wavy lower boundary |
| Ab4 | 73-80 | Dark grayish brown (10YR 4/2) sandy loam with massive structure; very few fine roots; few fine charcoal fragments; common burrows at base of horizon; clear, wavy lower boundary |
| BCb4 | 80-88 | Yellowish brown (10YR 5/4) sandy loam with massive structure; few fine to medium roots; gradual, wavy lower boundary |
| C | 88-100 | Pale brown (10YR 6/3) loamy sand with massive structure; few fine to medium roots; common light gray (10YR 7/2) irregular depletions with common faint strong brown (7.5YR 4/6) concentrations surrounding depletions; clear, wavy lower boundary |
| Bw1b5 | 100-110 | Brown (7.5YR 4/4) sandy clay loam with massive structure; common fine to medium roots; common charcoal fragments; clear, smooth lower boundary |
| Bw2b5 | 110-121 | Brown (7.5YR 5/4) sandy clay loam with massive structure; few fine to medium roots; very few, fine charcoal fragments; diffuse lamellae band present at base of horizon; gradual, smooth lower boundary |
| BCb5 | 121-139 | Yellowish brown (10YR 5/4) sandy loam with massive structure; few fine to medium roots; common light gray (10YR 7/2) depletions with common faint strong brown (7.5YR 4/6) concentrations surrounding depletions; clear, smooth lower boundary |
| Bwb6 | 139-166 | Brown (7.5YR 4/3) sandy clay loam with weak, medium, subangular blocky structure; few fine to medium roots; clear, wavy lower boundary |
| A/Bb7 | 166-198 | Brown (7/5YR 4/2) sandy clay loam with weak, fine, subangular blocky structure; very few medium roots; common, distinct pale brown (10YR 6/3) depletions with common faint strong brown (7.5YR 4/6) concentrations surrounding depletions; distinct fine lamellae bands towards base of horizon; large (~9 cm diameter) krotovina present; clear, wavy lower boundary |
| BCb7 | 198-207 | Yellowish brown (10YR 5/4) sandy loam with massive structure; common light gray (10YR 7/2) irregular depletions with common, faint strong brown (7.5YR 4/6) concentrations surrounding depletions; distinct, fine, continuous lamellae band towards base of horizon; clear, smooth lower boundary |
| Ab8 | 207-221 | Brown (7/5YR 4/2) silt loam with weak, fine subangular blocky structure; very few medium roots; common, distinct pale brown (10YR 6/3) depletions with common faint strong brown (7.5YR 4/6) concentrations surrounding depletions; clear, wavy lower boundary (horizon similar to overlying A/Bb7) |
| Bwb8 | 221-241 | Brown (7.5YR 4/3) silt loam with moderate, medium platy structure; common fine roots; diffuse, smooth lower boundary |
| BwCb8 | 241-252 | Brown (10YR 4/3) sandy loam with weak, medium subangular blocky structure; few fine roots; common light brownish gray (10YR 6/2) tubular depletions with common, distinct strong brown (7/5YR 4/6) concentrations surrounding depletions; clear, smooth lower boundary |
| Bwb9 | 252-275 | Brown (7.5YR 4/3) silt loam with moderate, medium, subangular blocky ped structure; common, fine roots; Pinkish gray (7.5YR 7/2) tap root structure; patchy, faint clay films; clear, smooth lower boundary |
| BCb9 | 275-300 | Brown (7.5YR 5/4) massive sandy loam with some weak, medium, subangular blocky ped structure; very fine roots; abrupt smooth lower boundary |
| Btb9 | 300-310 | Brown (7.5YR 4/3) silt loam with moderate, medium, subangular blocky ped structure; very few fine roots; common, continuous distinct clay films coating tubular pores; faint lamellae band towards base of horizon; clear, wavy lower boundary |
| ABtb10 | 310-342 | Dark brown (7.5YR 3/2) silt loam with moderate, medium, subangular blocky structure; no roots; few, medium tubular burrows; common, very fine, continuous clay films coating tubular pores; few, very fine clay films coating ped faces; diffuse, smooth lower boundary |
| Btx1b10 | 342-370 | Reddish brown (5YR 4/3) silty clay loam with moderate to strong, medium angular blocky ped structure; common, prominent, continuous reddish brown (2.5YR 4/3) clay films coating tubular pores; common, pale brown (10YR 6/3) silt coatings along tubular pores; Skeletal coatings along tubular pores and reddish brown clay film along the sides and bottom of ped faces were also observed; diffuse, smooth lower boundary |
| Btx2b10 | 370-389 | Brown (7.5YR 4/3) silty clay loam with moderate medium angular blocky ped structure; common, distinct, continuous clay films coating tubular pores; common, pale brown (10YR 6/3) distinct, spherical to laminar skeletal grain concentrations; diffuse, smooth lower boundary |
| BtCb10 | 389-398 | Brown (7.5YR 4/3) sandy clay loam with weak, fine, angular blocky ped structure; few, fine roots; very few, fine, discontinuous clay films coating tubular pores; prominent stone line composed of water-worn gravels; clear, smooth lower boundary |
| C/Btb10 | 398-416 | Brown (7.5YR 5/4) sandy loam with weak, medium, angular blocky to massive ped structure; few, very fine, roots; very few, distinct, discontinuous clay films coating tubular pores; reddish brown (5YR 4/3) coatings along tubular pores with skeletal grain infills; clear, smooth lower boundary |
| Bt&Eb11 | 416-438 | Reddish brown (5YR 4/3) silt loam lamellae with yellowish brown (10YR 5/4) fine sand interlamellae; massive ped structure; very few, fine roots; abrupt, smooth lower boundary |
| Bt&Eb11 | 438-453 | Reddish brown (5YR 4/3) sandy loam lamellae with pale brown (10YR 6/3) loamy sand interlamellae; massive ped structure; very few, fine roots; abrupt, smooth lower boundary |
| Bt&E2b11 | 453-471 | Reddish brown (2.5YR 4/4) silt loam lamellae with pale brown (10YR 6/3) loamy sand interlamellae; massive ped structure; concentration of small pebbles overlain by large cobbles (ice raft debris?); abrupt, smooth lower boundary |
| E&Btb11 | 471-514 | Yellowish brown (10YR 5/4) loamy sand interlamellae with reddish brown (5YR 4/3) interlamellae; massive ped structure; very few, fine roots; clear, smooth lower boundary |
| C1 | 514-528 | Light brownish gray (10YR 6/2) fine sand; no roots; faint, planar cross-laminations; horizon coarsens upwards; clear, smooth lower boundary |
| C2 | 528-546 | Pale brown (10YR 6/3) loamy sand; no roots; faint, planar cross-laminations; 1 cm thick discontinuous lamellae at top of horizon; abrupt, smooth lower boundary |
| 2C | 546-644 | Light gray (10YR 7/2) interbedded fine and medium sand with some beds coarsening upwards |
| 3C | >644 | Heterolithic cobbles |
